# Supplementary material
Source: HighWire-hosted journal article supplement (https://www.jrheum.org/highwire/filestream/42326/field_highwire_adjunct_files/0/220270DataSuppl.pdf)
Supplement: 220270DataSuppl.pdf [file 220270DataSuppl.pdf]

| eGFR,<br>(ml/min/1.73m <sup>2</sup> ) | Allopurinol dose (mg/day)*<br>(n= 88) | Serum Urate (mmol/L)*<br>(n=73) |
|---------------------------------------|---------------------------------------|---------------------------------|
| ≥60                                   | 473 (201)                             | 0.36 (0.12)                     |
| 30 to <60                             | 398 (133)                             | 0.30 (0.08)                     |
| <30                                   | 230 (39)                              | 0.34 (0.14)                     |

**SUPPLEMENTARY TABLE S1** Allopurinol dose and serum urate in different eGFR groups  
eGFR =estimated glomerular filtration rate, \*mean (SD)

| eGFR,<br>(ml/min/1.73m <sup>2</sup> ) | Number of<br>participants | Change in allopurinol dose from last study visit to<br>follow-up study (mg/day) |        |                       |          |
|---------------------------------------|---------------------------|---------------------------------------------------------------------------------|--------|-----------------------|----------|
|                                       |                           | Mean                                                                            | Median | Standard<br>Deviation | p-value* |
| ≥60                                   | 44                        | -7.95                                                                           | 0      | 194                   | 0.29     |
| 30-60                                 | 35                        | -61.4                                                                           | 0      | 154                   |          |
| ≤ 30                                  | 6                         | -100                                                                            | -50    | 126                   |          |

**SUPPLEMENTARY TABLE S2** eGFR groups at follow-up versus change in allopurinol dose  
eGFR =estimated glomerular filtration rate, \*Kruskal-Wallis

|                                          | Serum urate<br>(mmol/L)  | Creatinine<br>(umol/L)   | Flare (in the<br>preceding 12<br>months) |
|------------------------------------------|--------------------------|--------------------------|------------------------------------------|
| Creatinine<br>(umol/L)                   | r = -0.10<br>p = 0.35    |                          |                                          |
| Flare (in the<br>preceding 12<br>months) | r = 0.35<br>p = 0.004**  | r = 0.07<br>p = 0.56     |                                          |
| Allopurinol dose<br>(mg/day)             | r = -0.32<br>p = 0.003** | r = -0.26<br>p = 0.009** | r = -0.12<br>p = 0.26                    |

**SUPPLEMENTARY TABLE S3** Correlation between serum urate, creatinine, flares and allopurinol  
Spearman's rho, \*\*correlation is significant at the 0.01 level (2-tailed)

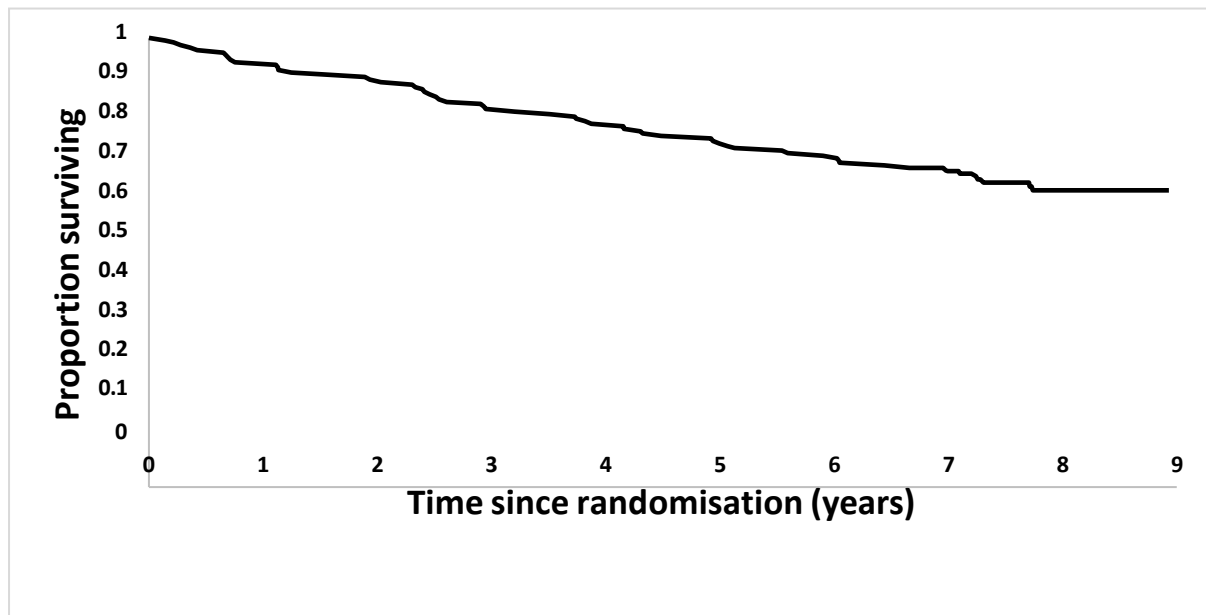

**SUPPLEMENTARY FIGURE S1** Kaplan-Meier estimates of participant survival following randomisation
